# Supplementary material for: Efficient removal of norfloxacin from water using batch airlift-electrocoagulation reactor: optimization and mechanisms analysis
Source: Royal Society of Chemistry journal article supplement (doi:10.1039/d3ra00471f), 2023-01-01
Supplement: d3ra00471f1.pdf [file d3ra00471f1.pdf]

**Table S1: NOR degradation intermediates in EC process**

| Products | <i>m/z</i> | Structural Formula                                                                   |
|----------|------------|--------------------------------------------------------------------------------------|
| NOR      | 320        | 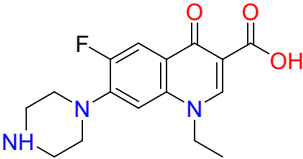   |
| M1       | 294        |    |
| M2       | 248        |    |
| M3       | 220        |   |
| M4       | 251        |  |
| M5       | 236        |  |
| M6       | 279        |  |
| M7       | 252        |  |

M8

268

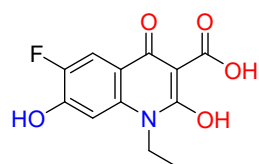

**Fig. S1. Intermediate peaks during NOR removal**

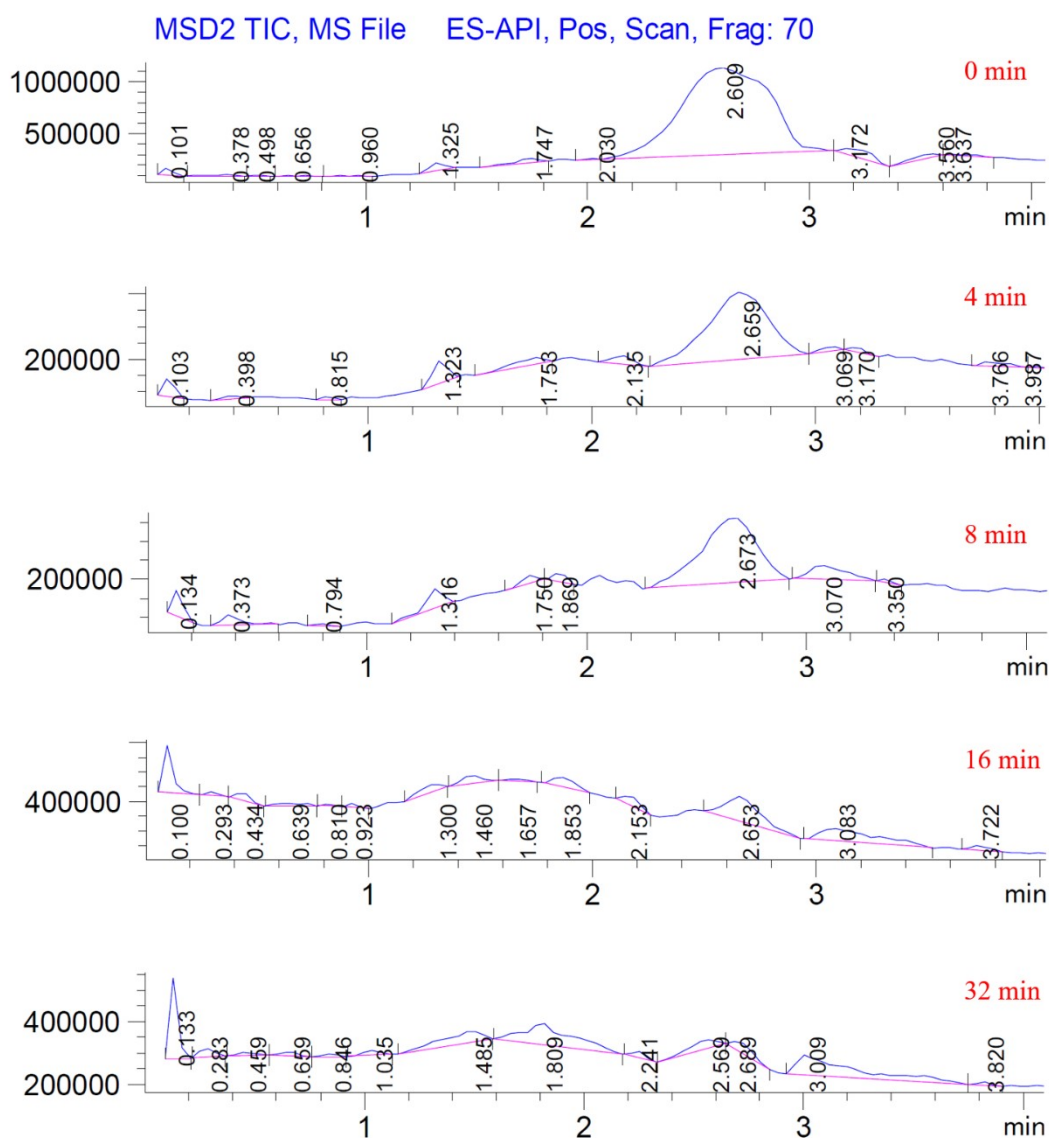

\* The chromatographic column is X Bridge C18 (50 mm×4.6 mm×5 μm), the flow phase is methanol (95%) and pure water (5%), the flow rate is 0.4 mL min<sup>-1</sup>, the injection volume is 20 μL, the ion source is ESI.
